# Supplementary material for: Simultaneous enhancements in photon absorption and charge transport of bismuth vanadate photoanodes for solar water splitting
Source: PubMed Central journal article supplement (PMC4640143; doi:10.1038/ncomms9769), 2015-10-26
Supplement: ncomms9769-s1.pdf [file ncomms9769-s1.pdf]

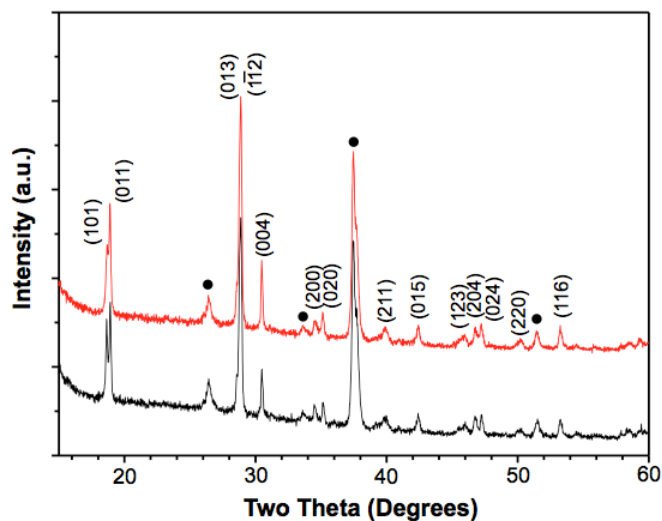

**Supplementary Figure 1.** XRD patterns of  $\text{BiVO}_4$  (black) and  $\text{N}_2$ -treated  $\text{BiVO}_4$  (red). The (hkl) indices are based on JCPDF 83-1699 (Space group: I 2/b). No detectable changes were observed by comparing these patterns probably because the peaks generated by thin nanoporous  $\text{BiVO}_4$  films could not provide sufficient resolution. The peaks from FTO are indicated by black circles.

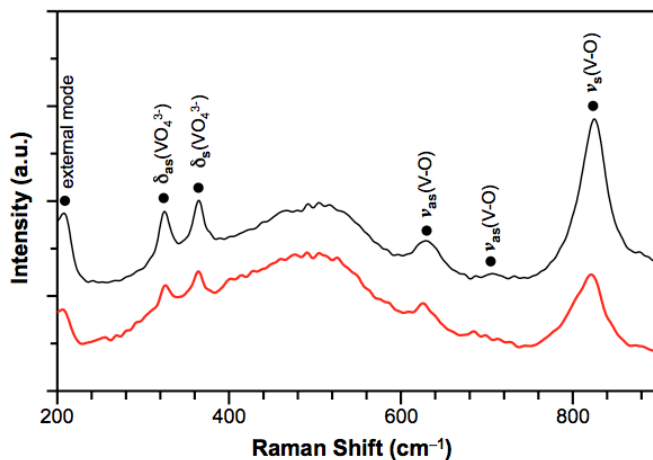

**Supplementary Figure 2.** Raman spectra of  $\text{BiVO}_4$  (black) and  $\text{N}_2$ -treated  $\text{BiVO}_4$  (red).  $\text{N}_2$ -treated  $\text{BiVO}_4$  shows significant broadening of various V-O stretching and  $\text{VO}_4^{3-}$  deformation modes, suggesting that  $\text{N}_2$  treatment indeed affected the local coordination of V in the bulk  $\text{BiVO}_4$  sample ( $\nu_s$ : symmetric stretching mode,  $\nu_{as}$ : asymmetric stretching mode,  $\delta_s$ : symmetric deformation mode,  $\delta_{as}$ : asymmetric deformation mode).

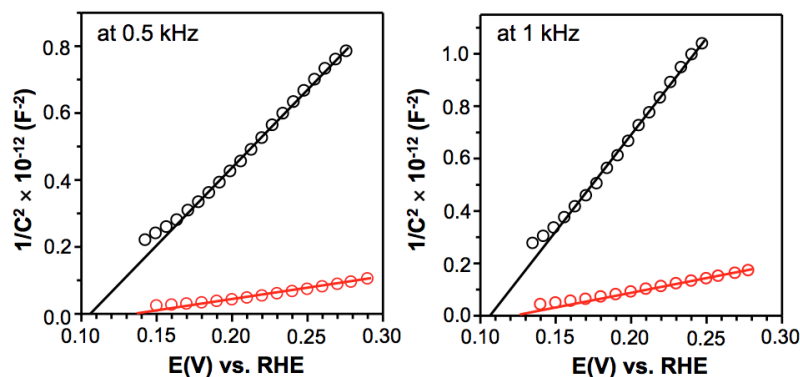

**Supplementary Figure 3.** Mott Schottky plots of  $\text{BiVO}_4$  (black) and  $\text{N}_2$ -treated  $\text{BiVO}_4$  (red) measured in a 0.5 M phosphate buffer (pH 7.2) at two different frequencies, 0.5 kHz and 1 kHz.

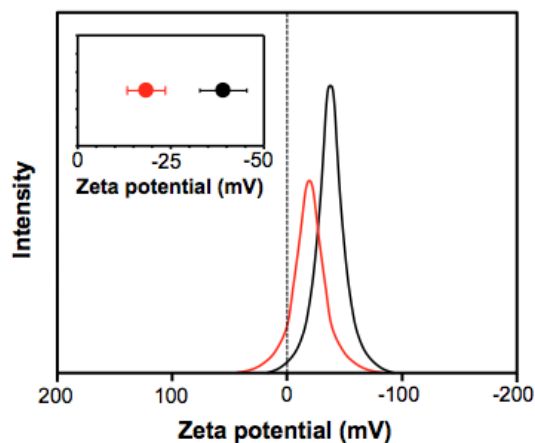

**Supplementary Figure 4.** Zeta potential measurement of  $\text{BiVO}_4$  (black) and  $\text{N}_2$ -treated  $\text{BiVO}_4$  (red) in a 0.5 M phosphate buffer solution (pH 7.2). The  $\text{pH}_{\text{PZZP}}$  of  $\text{BiVO}_4$  and  $\text{N}_2$ -treated  $\text{BiVO}_4$  could not be directly measured because  $\text{BiVO}_4$  is not chemically stable near its  $\text{pH}_{\text{PZZP}}$ . However, zeta potentials at pH 7.2 solution could be used to compare the  $\text{pH}_{\text{PZZP}}$ s of  $\text{BiVO}_4$  and  $\text{N}_2$ -treated  $\text{BiVO}_4$ .  $\text{N}_2$ -treated  $\text{BiVO}_4$  has a more positive zeta potential than  $\text{BiVO}_4$  at pH 7.2, which means that  $\text{pH}_{\text{PZZP}}$  of  $\text{N}_2$ -treated  $\text{BiVO}_4$  is higher than that of  $\text{BiVO}_4$ .

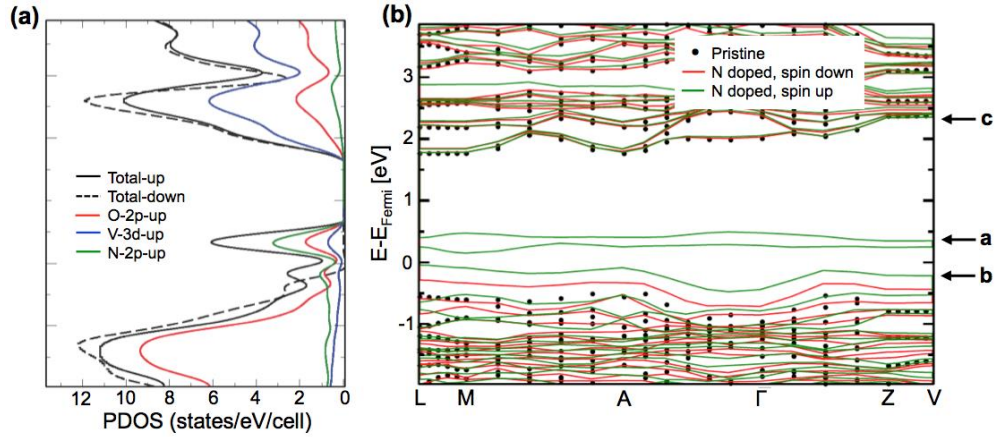

**Supplementary Figure 5.** (a) Projected density of states for N-doped  $\text{BiVO}_4$  (12.5% O replaced with N) obtained from DFT-PBE calculations; total density of states for up (black solid) and down (black dashed) spins as well as spin up O 2p (red), V 3d (blue) and N 2p (green) states. The reference energy was set at the top of the valence band of N-doped  $\text{BiVO}_4$ . (b) Band structures of pristine and N-doped  $\text{BiVO}_4$  (12.5% O replaced with N), obtained from DFT-PBE calculations, and aligned using the position of the 3s energy levels of V atoms that are not first neighbors of the defects.

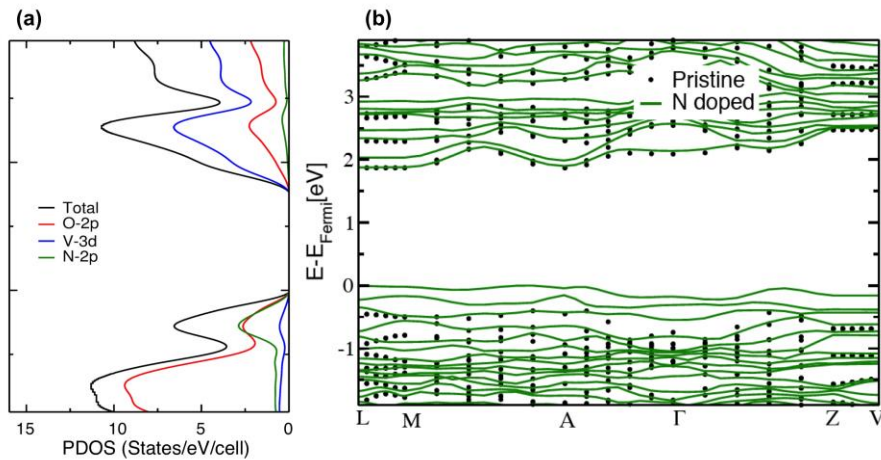

**Supplementary Figure 6.** (a) Projected density of states for N-doped  $\text{BiVO}_4$  (12.5% O replaced with N followed by artificially adding an electron per nitrogen to compensate for the excess holes from N substitution) obtained from DFT-PBE calculations; total density of states (black solid) as well as O 2p (red), V 3d (blue) and N 2p (green) states (spin up and down states are identical). The reference energy was set at the top of the valence band of N-doped  $\text{BiVO}_4$ . (b) Band structures of pristine and N-doped  $\text{BiVO}_4$  (12.5% O replaced with N), obtained from DFT-PBE calculations, and aligned using the position of the 3s energy levels of V atoms that are not first neighbors of the defects.

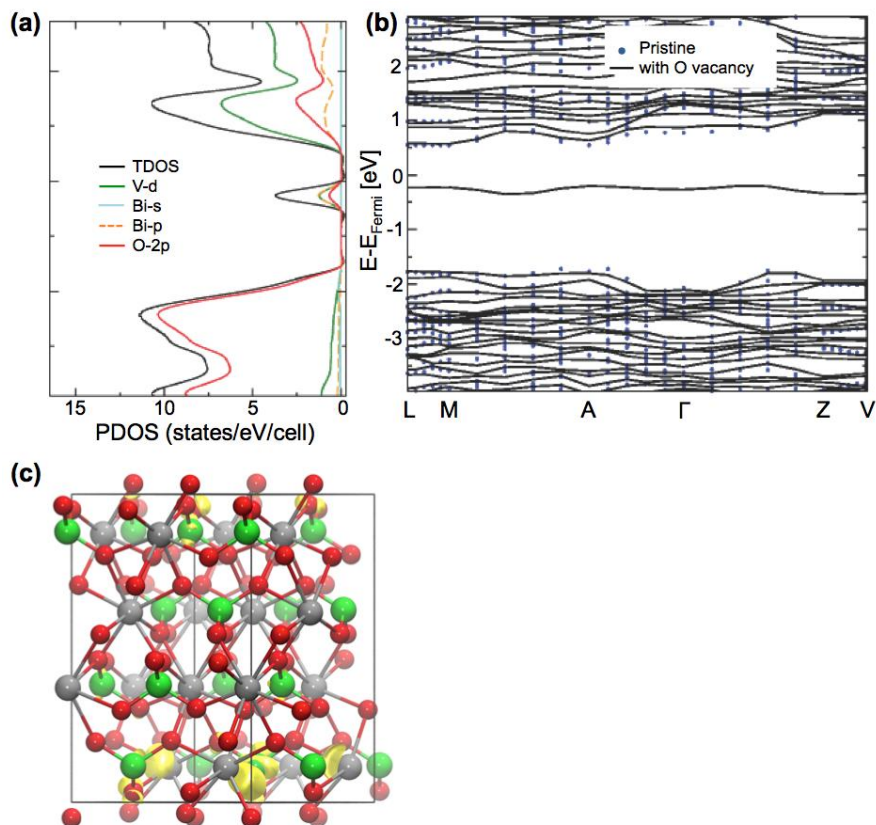

**Supplementary Figure 7.** (a) Projected density of states of  $\text{BiVO}_4$  with 6% O vacancy obtained within DFT-PBE. The reference energy was set at the Fermi level of defective  $\text{BiVO}_4$ . (b) Band structures of pristine (blue dots)  $\text{BiVO}_4$  and  $\text{BiVO}_4$  with 6% O vacancy (black line) obtained at the PBE level of theory; the two band structures were aligned using the position of the 3s energy levels of V atoms away from the O vacancies. (c) Spin density (yellow iso-surfaces at  $0.0049 \text{ e bohr}^{-3}$ ) of the isolated band at the  $\Gamma$  point; green, silver and red spheres represent V, Bi and O atoms, respectively.

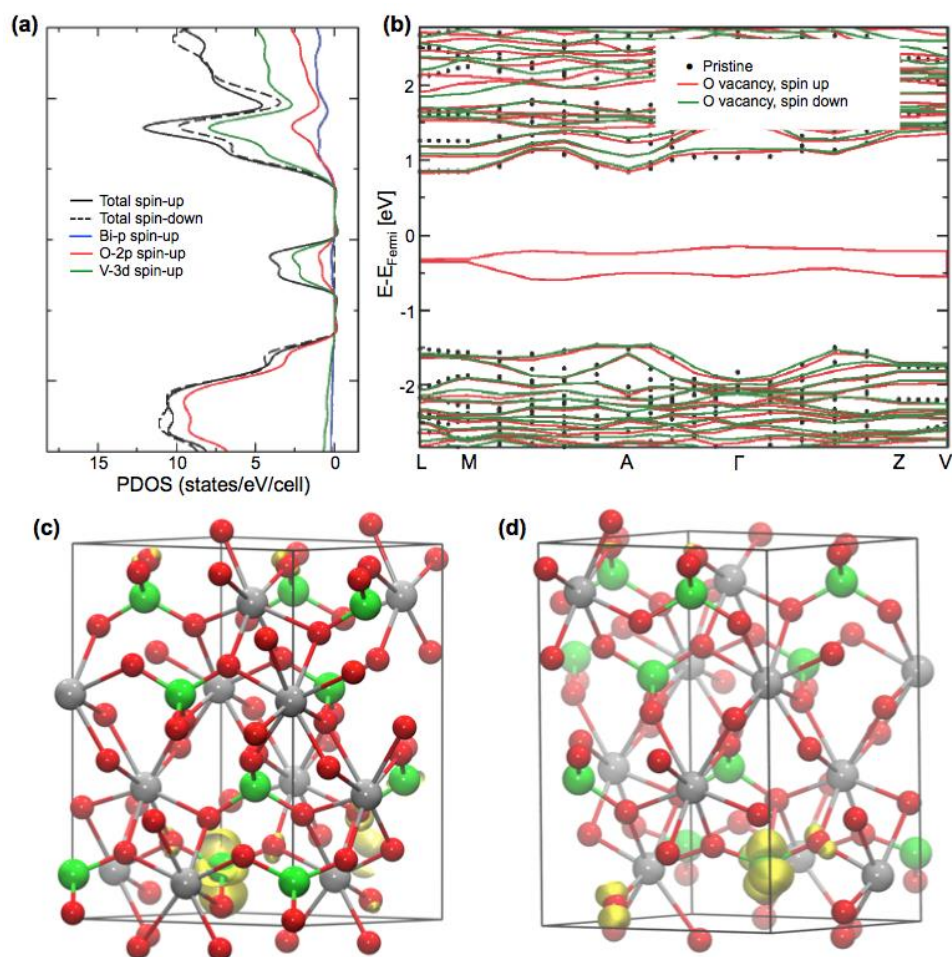

**Supplementary Figure 8.** (a) Projected density of states of BiVO<sub>4</sub> with 6% O vacancy obtained within DFT-PBE+U. (b) Band structures of pristine BiVO<sub>4</sub> (black dots) and BiVO<sub>4</sub> with 6% O vacancy at the PBE+U level of theory for spin up (red) and down (green). The two band structures were aligned using the position of the 3s energy levels of V atoms away from the O vacancies. The reference energy was set at the Fermi level of defective BiVO<sub>4</sub>. (c) and (d) Spin density (yellow iso-surfaces at 0.0049 e bohr<sup>-3</sup>) of the two isolated bands at the  $\Gamma$  point; V (green), Bi (silver), and O (red) atoms.

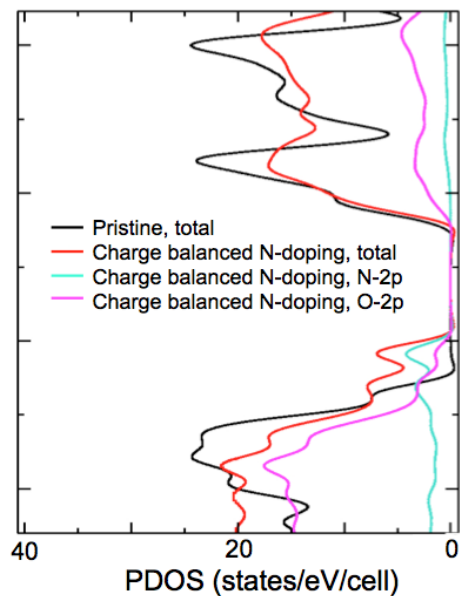

**Supplementary Figure 9.** Density of states of pristine  $\text{BiVO}_4$  (black) and  $\text{BiVO}_4$  with charge-balanced N doping (9% O replaced with 6% N and 3% O vacancy) (red) at the PBE level of theory.

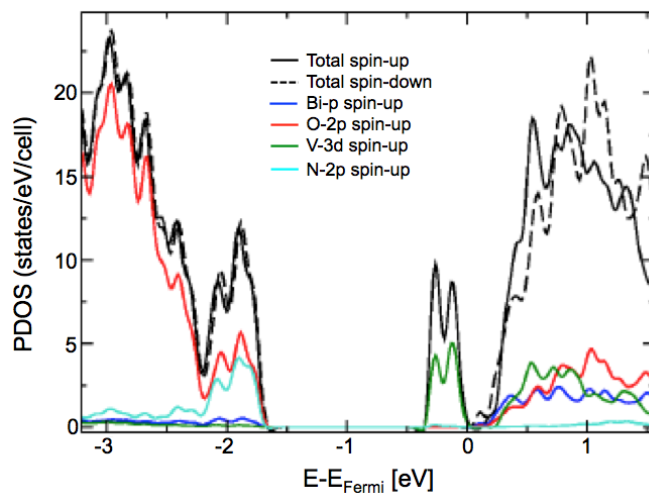

**Supplementary Figure 10.** (a) Projected density of states of charge-balanced N-doped  $\text{BiVO}_4$  with additional O vacancies (6% N and 6% O vacancies). The reference energy is set at the Fermi level of the doped system, obtained within DFT-PBE.

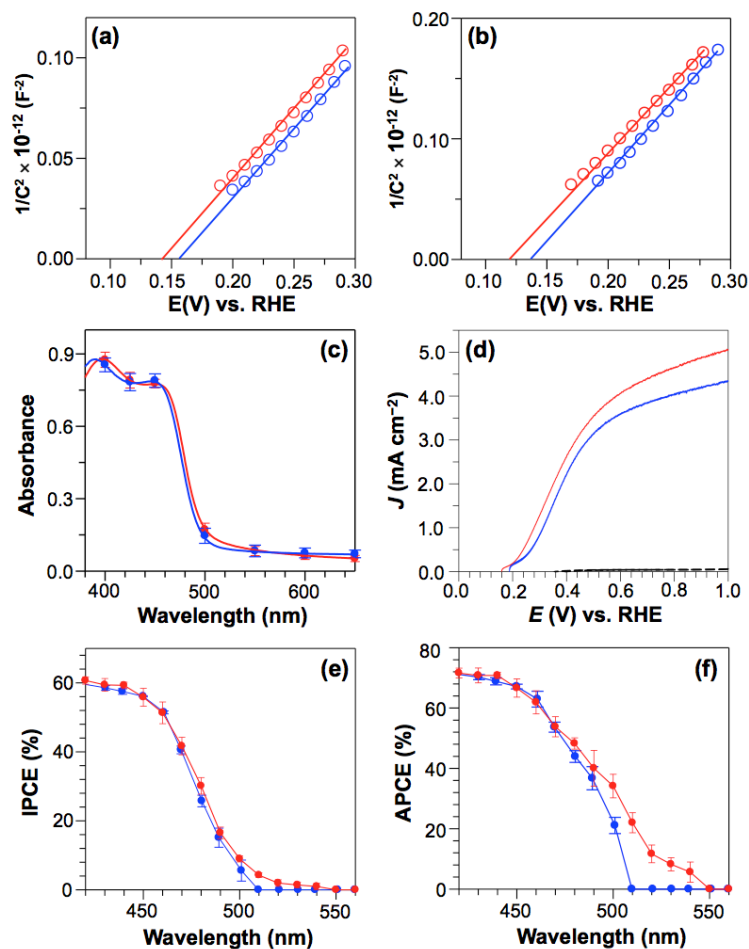

**Supplementary Figure 11.** Mott-Schottky plots of N<sub>2</sub>-treated BiVO<sub>4</sub> (red) and H<sub>2</sub>-treated BiVO<sub>4</sub> (blue) at (a) 0.5 kHz and (b) 1 kHz measured in a 0.5 M phosphate buffer (pH 7.2). (c) UV-Vis absorption spectra, (d)  $J$ - $V$  plots for sulfite oxidation, (e) IPCE, and (f) APCE of N<sub>2</sub>-treated BiVO<sub>4</sub> (red) and H<sub>2</sub>-treated BiVO<sub>4</sub> (blue).  $J$ - $V$  plots were obtained in a 0.5 M phosphate buffer (pH 7.2) containing 1 M Na<sub>2</sub>SO<sub>3</sub> under AM 1.5 G, 100 mW cm<sup>-2</sup> illumination (scan rate, 10 mV s<sup>-1</sup>). IPCE and APCE were obtained at 0.6 V vs. RHE in the same electrolyte. H<sub>2</sub>-treated BiVO<sub>4</sub> used in these experiments was prepared by annealing BiVO<sub>4</sub> at 350 °C for 2 h while flowing H<sub>2</sub>, which generated oxygen vacancies in the BiVO<sub>4</sub> lattice. The comparable slopes of the Mott-Schottky plots of N<sub>2</sub>-treated and H<sub>2</sub>-treated samples show that they have comparable concentrations of O-vacancies serving as donors. The UV-Vis spectrum of H<sub>2</sub>-treated BiVO<sub>4</sub> shows a significant absorption before the absorption edge ( $\lambda > 510$  nm) most likely due to the presence of irregular O defects generating interband states in the bandgap region. However, IPCE and APCE plots of H<sub>2</sub>-treated BiVO<sub>4</sub> confirm that the bandgap of H<sub>2</sub>-treated samples is the same as untreated BiVO<sub>4</sub>. The APCE comparison of N<sub>2</sub>-treated and H<sub>2</sub>-treated samples shows that although they have the same amount of O vacancies, the electron-hole separation of N<sub>2</sub>-treated samples is more enhanced at  $470 \text{ nm} \leq \lambda < 510 \text{ nm}$ . (The photocurrent onset of H<sub>2</sub>-treated samples is 510 nm, so APCE at  $\lambda \geq 510$  nm is not considered.) This suggests that N<sub>2</sub>-treated samples have other factors that additionally enhance electron-hole separation. This agrees well with the calculation result that N incorporation increases the mobility of polarons and can further enhance electron transport properties and electron-hole separation. This explanation also agrees well with the results discussed in Figure S12.

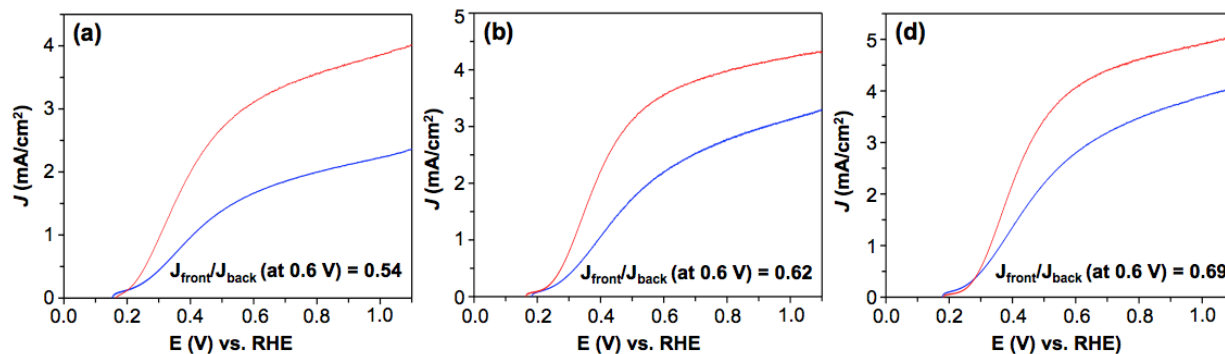

**Supplementary Figure 12.** Comparison of photocurrents generated from front-side illumination (blue) and back-side illumination (red) for (a) BiVO<sub>4</sub>, (b) H<sub>2</sub>-treated BiVO<sub>4</sub>, and N<sub>2</sub>-treated BiVO<sub>4</sub> in a 0.5 M phosphate buffer (pH 7.2) containing 1 M Na<sub>2</sub>SO<sub>3</sub> under AM 1.5 G, 100 mW cm<sup>-2</sup> illumination (scan rate, 10 mV s<sup>-1</sup>). Comparing photocurrents generated from front-side illumination ( $J_{\text{back}}$ ) and back-side illumination ( $J_{\text{back}}$ ) of BiVO<sub>4</sub> provides information as to whether electron transport or hole transport limits the charge transport and electron-hole separation. An indication of poor electron transport being a limiting factor for electron-hole separation in BiVO<sub>4</sub> is demonstrated by  $J_{\text{front}}/J_{\text{back}} < 1$  (0.54 at 0.6 V vs. RHE). The H<sub>2</sub>-treated BiVO<sub>4</sub> shows an increase in both  $J_{\text{front}}$  and  $J_{\text{back}}$  but  $J_{\text{front}}$  increases more significantly, making  $J_{\text{front}}/J_{\text{back}} = 0.62$ . This is because O vacancies generated by H<sub>2</sub> treatment increase the majority carrier density and improve electron transport. The N<sub>2</sub>-treated BiVO<sub>4</sub> also increases both  $J_{\text{front}}$  and  $J_{\text{back}}$  due to enhanced photon absorption. If N incorporation improves only the photon absorption,  $J_{\text{front}}/J_{\text{back}}$  should be similar to that of H<sub>2</sub>-treated samples since they have similar carrier densities and, therefore, they must have similar electron transport properties. However, the N<sub>2</sub>-treated sample shows an increase in  $J_{\text{front}}/J_{\text{back}}$  to 0.69, suggesting that N-incorporation additionally improves electron transport property via the mobility increase.



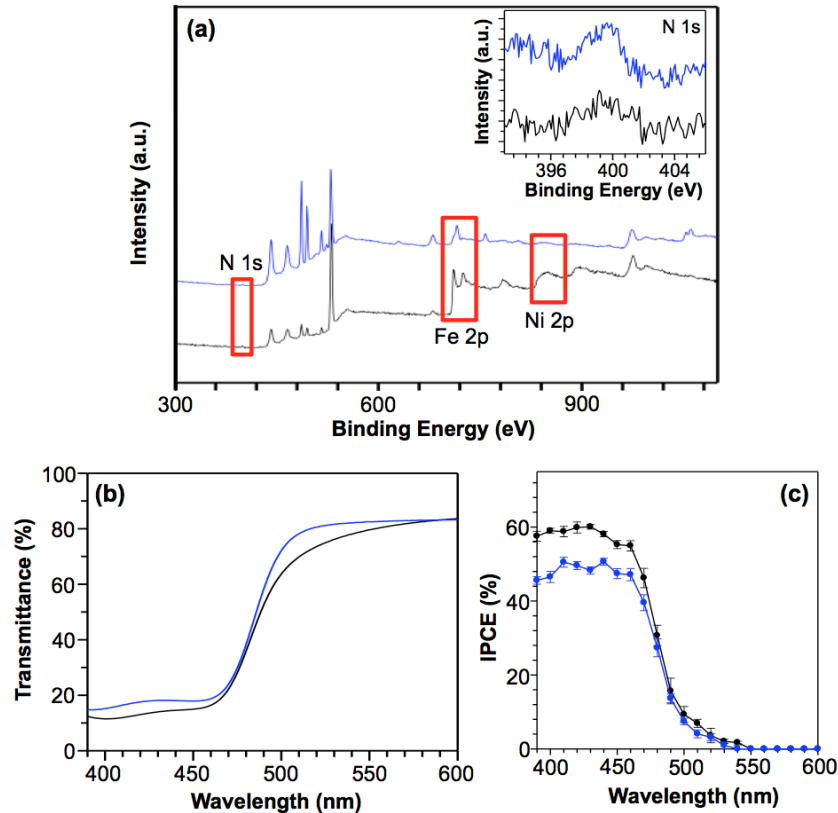

**Supplementary Figure 13.** (a) XPS comparison of  $\text{N}_2$ -treated  $\text{BiVO}_4/\text{FeOOH}/\text{NiOOH}$  before (black) and after (blue) 30 hours of photooxidation of water at 0.6 V vs. RHE in a 0.5 M phosphate buffer (pH 7.2) under AM 1.5G,  $100 \text{ mW cm}^{-2}$  illumination. The result shows a significant reduction in Ni 2p and Fe 2p peaks. The N 1s peak from  $\text{N}_2$ -treated  $\text{BiVO}_4$  remained intact suggesting that N in the  $\text{BiVO}_4$  is stable. (The N 1s peak after water oxidation looks slightly more enhanced due to the loss of the OEC layers covering the  $\text{N}_2$ -treated  $\text{BiVO}_4$  surface.) (b) UV-Vis spectra and (c) IPCE plots of  $\text{N}_2$ -treated  $\text{BiVO}_4/\text{FeOOH}/\text{NiOOH}$  before (black) and after (blue) 30 hours of photooxidation of water. When the OEC coating is removed during water oxidation, the resulting accumulation of photogenerated holes at the  $\text{N}_2$ -treated  $\text{BiVO}_4$  surface is expected to result in the dissolution loss of  $\text{BiVO}_4$  by the photooxidation of  $\text{BiVO}_4$ . This is confirmed by the increase in transmittance and the decrease in IPCE in the wavelength region allowing for the bandgap transition in  $\text{N}_2$ -treated  $\text{BiVO}_4/\text{OECs}$  after water oxidation. However, the IPCE plot of  $\text{N}_2$ -treated  $\text{BiVO}_4/\text{FeOOH}/\text{NiOOH}$  still shows an earlier onset for bandgap transition confirming that N incorporated into the  $\text{BiVO}_4$  lattice is stable under anodic bias and illumination. (It is more accurate to use the IPCE data than UV-Vis spectra to check the presence of N decreasing the bandgap of  $\text{BiVO}_4$  because the tailing of the UV-Vis spectra below the bandgap can be very sensitive to the various defects present on the  $\text{BiVO}_4$  surface and can change even when the bandgap remains the same.)

**Supplementary Table 1.**  $J_{\text{abs}}$ ,  $\phi_{\text{sep}}$  (at 0.6 V vs. RHE), and  $J_{\text{pec(sulfite)}}$  (at 0.6 V vs. RHE) of pristine and  $\text{N}_2$ -treated  $\text{BiVO}_4$ . The confidence intervals were determined at the 95% confidence level using measurements on three different samples.

|                                        | $J_{\text{abs}}$                   | $\phi_{\text{sep}}$<br>(at 0.6 V vs. RHE) | $J_{\text{pec(sulfite)}}$<br>(at 0.6 V vs. RHE) |
|----------------------------------------|------------------------------------|-------------------------------------------|-------------------------------------------------|
| <b>Pristine</b>                        | $4.44 \pm 0.06 \text{ mA cm}^{-2}$ | $0.70 \pm 0.04$                           | $3.27 \pm 0.31 \text{ mA cm}^{-2}$              |
| <b><math>\text{N}_2</math>-treated</b> | $5.30 \pm 0.09 \text{ mA cm}^{-2}$ | $0.76 \pm 0.07$                           | $4.16 \pm 0.41 \text{ mA cm}^{-2}$              |

**Supplementary Table 2.** Summary of major findings in different doping cases.

| Composition                                                                                    | Shift of VBM [eV] | Bandgap [eV] | Presence of mid-gap states | Polaron formation         |
|------------------------------------------------------------------------------------------------|-------------------|--------------|----------------------------|---------------------------|
| Pristine $\text{BiVO}_4$                                                                       | 0.0               | 2.25         | No                         | No                        |
| N-doping (12.5%) <sup>1</sup>                                                                  | 0.48              | 1.77         | Yes                        | No                        |
| N-doping (12.5%) with extra electrons added to the system <sup>2</sup>                         | 0.39              | 1.86         | No                         | No                        |
| O vacancy (6%) <sup>3</sup>                                                                    | 0                 | 2.25         | Yes                        | Yes (small polarons at V) |
| Charge-balanced N-doping (6% N and 3% O vacancy) <sup>4</sup>                                  | 0.3-0.4           | 1.85-1.95    | No                         | No                        |
| Charge-balanced N-doping with additional oxygen vacancies (6% N and 6% O vacancy) <sup>5</sup> | 0.3               | 1.95         | Yes                        | Yes (small polarons at V) |

<sup>1</sup> Created by replacing 12.5% neutral O atoms with neutral N atoms.

<sup>2</sup> Created by replacing 12.5% neutral O atoms with neutral N atoms, followed by artificially adding one electron per nitrogen to compensate for holes generated by charge imbalanced N substitution.

<sup>3</sup> Created by removing 6% neutral O atoms. Two electrons at each O vacancy are spontaneously ionized and localized at V atoms. As a result, the charge state of an O vacancy is  $q = +2$  and two small polarons are formed at V.

<sup>4</sup> Created by replacing 9% neutral O atoms with 6% neutral N atoms and 3% O vacancy. The electrons generated by O vacancies neutralize the holes generated by N substitution, balancing the charge.

<sup>5</sup> Created by replacing 9% neutral O atoms with 6% neutral N atoms and 3% O vacancy, followed by additional removal of 3% neutral O atoms. The electrons from 3% O vacancies are used to compensate for the charge change by N substitution and the electrons from the other 3% O vacancies are ionized and localized at V atoms, forming small polarons.

(1)
